1 **Using a Quality Improvement Approach to improve reporting of malaria deaths in**  
2 **Namutumba District, Eastern Uganda, 2022–2023**

3 Marie Gorreti Zalwango<sup>1\*</sup>, Richard Migisha<sup>1</sup>, Benon Kwesiga<sup>1</sup>, Lilian Bulage<sup>1</sup>, Daniel Kadobera<sup>1</sup>,  
4 Alex Riolexus Ario<sup>1</sup>

5 **Institutional Affiliation:** <sup>1</sup>Uganda Public Health Fellowship Program, Uganda National Institute  
6 of Public Health, Kampala, Uganda

7 **\*Correspondence:** Tel: +256752610802, Email: [gzalwango@uniph.go.ug](mailto:gzalwango@uniph.go.ug)

8 **Abstract**

9 **Background**

10 Reporting malaria deaths is critical for assessing prevention and case management  
11 interventions. In Uganda, malaria mortality is recorded in inpatient registers and reported  
12 through weekly and monthly surveillance reports. During a data quality assessment in  
13 Namutumba District in October 2022, we found more malaria deaths in health facility registers  
14 than were reported. We conducted a continuous quality improvement initiative to improve the  
15 accuracy of reported malaria deaths in Namutumba District.

16 **Methods:** We purposively selected 2 high-level health centers (HC) in Namutumba District that  
17 reported malaria deaths during September 2021–October 2022. We formed quality  
18 improvement teams (QIT) comprising clinical and statistical staff at the HC. We held focus group  
19 discussions with QITs to identify challenges with reporting malaria deaths, prioritized areas for  
20 improvement, and conducted root cause analysis. Using the plan, do, study, act (PDSA) cycle,  
21 we identified change ideas to address root causes.

22 **Interventions:** Challenges included knowledge gaps on malaria death definitions, lack of  
23 consequences for failing to document deaths, and unclear guidance on how to document  
24 deaths. Sustainable interventions identified included continuous medical education on malaria  
25 death definition, one-on-one mentorship of staff on documentation in inpatient registers, and  
26 weekly verification of inpatient register data, all implemented during November 2022–February  
27 2023.

28 **Results:** Of the 36 malaria deaths that occurred during the baseline period (September 2021–  
29 October 2022), 25 (69%) were included in the weekly report, and four (11%) in the monthly  
30 report. Following the intervention implementation, all 7 malaria deaths recorded at the 2  
31 health facilities during November 2022–February 2023 were reported in the weekly and  
32 monthly reports.

33 **Conclusion:** Continuous medical education, supervision and mentoring of HC staff, and clear  
34 and comprehensive guidance on documenting malaria deaths could facilitate improved malaria  
35 death reporting from HC in Uganda, enabling more accurate resource allocation for malaria  
36 control.

37 **Keywords:** Malaria deaths, Malaria, Quality improvement, Reporting, Namutumba, Uganda

38

## 39 Introduction

40 Malaria is one of the leading causes of mortality globally, responsible for 608,000 deaths in  
41 2022. The vast majority (96%) of the reported deaths occur in 29 sub-Saharan Africa countries  
42 Uganda inclusive. Uganda ranks eighth globally among countries with the highest burden of  
43 malaria deaths. It causes 20-30 deaths weekly and around 1,300 annually, as per the Uganda  
44 Health Management Information System (HMIS) [1]. Due to challenges in reporting malaria  
45 deaths, the HMIS-reported numbers have been adjusted for underreporting, resulting in an  
46 estimated 19,600 deaths annually, according to the World Malaria Report [2].

47 Based on findings from a community study conducted in Namutumba District, several  
48 community malaria deaths were documented at health facilities but not recorded in the health  
49 information system due to deaths occurring before reaching high-level facilities [3].  
50 Subsequently, we conducted a data quality assessment (DQA) from September 2021 to October  
51 2022 with the aim of determining the accuracy of health facility malaria deaths data. By  
52 comparing registers and client cards to surveillance reports (HMIS 033b and HMIS 108) through  
53 the District Health Information System version 2 (DHIS2), the DQA revealed a discrepancy. Out  
54 of 36 malaria deaths recorded, 25 (69%) were included in the weekly report, and 4 (11%) in the  
55 monthly report, indicating an inconsistency in reporting between registers and surveillance  
56 reports.

57 The low reporting of actual numbers of malaria as the cause of deaths due to various challenges  
58 contribute to underestimation of the true magnitude of malaria deaths. Without accurate  
59 reporting of malaria mortality data at the district and national levels, planning for effective  
60 interventions to prevent malaria deaths remains insufficient, posing a challenge to the goal of  
61 malaria eradication by 2030. This initiative focused on improving the accuracy of reported  
62 malaria deaths in selected health facilities in Namutumba District during September 2021–  
63 October 2022, to provide a case study for improvement in other health facilities and districts in  
64 Uganda.

65

## 66 Methods

### 67 Project implementation setting

68 We conducted the quality improvement project in Namutumba District based on the previous  
69 low number of malaria deaths reported as per findings from the DQA. Namutumba District is  
70 located in the eastern part of Uganda, a region highly endemic for malaria [4, 5]. The district is  
71 made up of 2 constituencies and 20 sub-counties and has a total population of approximately  
72 320,000 people. The population is served by 2 private hospitals, 1 public health center (HC) IV,  
73 seven HC IIIs, and 25 HC IIs [6]. However, due to the low economic status of the residents in the  
74 district, majority of the patients utilize services at the HC IV which serves as the district referral  
75 health unit beyond which patients are referred to higher facilities outside the district for further  
76 management. We conducted the project in two high-level HCs in Namutumba District because

77 of their high capacity for severe malaria admissions and the high likelihood for malaria deaths.  
78 These were Namutumba HC III and Nsinze HC IV.

### 79 **Project implementation design**

80 The quality improvement model used for our project focuses on 3 fundamental questions.  
81 What are we trying to accomplish? How will we know if a change is an improvement? and what  
82 changes can we make that will result in an improvement? Building on this information, we  
83 rejuvenated the Quality Improvement Team(QIT) for the selected facilities. This step was  
84 followed by collection of baseline data and we supported the teams to identify their problems  
85 and define their improvement objective. We further identified measures and changes to be  
86 made for improvement and implemented them using the Plan Do Study Act (PDSA) model.

### 87 **Continuous quality improvement team formation**

88 We reconstituted the QIT at each facility to coordinate the implementation of project activities.  
89 The teams constituted included the malaria focal person, in-charge, health facility QI focal  
90 person, records assistant, and two clinicians at the outpatient clinic and inpatient ward. The  
91 roles of the QIT were as follows: 1) Team lead – responsible for assigning roles and adding a  
92 voice where it was required. Members on the project were asked to appoint their own leader  
93 and change when need arise. 2) Mentor – responsible for guiding the team in carrying out  
94 certain roles, and provided mentorship to the team members. 3) Data person – responsible for  
95 data collection and analysis of the collected data. 4) Support personnel – provided information  
96 or any additional assistance required to conduct the project.

### 97 **Baseline data collection**

98 We analyzed health facility data for Nsinze HC IV and Namutumba HC III for the period of  
99 September 2021 to October 2022 to serve as our baseline for malaria deaths reporting. This  
100 involved review of the HMIS data for the HMIS 033b weekly surveillance report and the HMIS  
101 105 monthly report, review of client cards for all admitted patients, review of the inpatient  
102 register and the outpatient register for cases that might have died before admission. This  
103 information helped the team to identify gaps in data capture and reporting. Using a score of 0-5  
104 on the spider graph (5 being the highest ranking), the identified gaps were prioritized for  
105 problem analysis.

### 106 **Process mapping and gap identification**

107 We reviewed the process of data capture in the primary data tools, data collection and data  
108 entry into the electronic HMIS system through focus group discussions with the facility teams.  
109 This was done to identify the step in the process with the most challenges affecting reporting  
110 for malaria deaths. Using the spider graph, gaps under each step of the process were charted  
111 for prioritization of the step with the most gaps.

### 112 **Problem analysis and root cause identification**

113 Following prioritization of the problem, the QIT did problem analysis for the identified gaps to  
114 identify the root causes for low reporting for malaria deaths using the ‘five whys’ technique. For

115 each of the problems, the team exhausted the possible causes until when the root cause was  
116 reached. These findings were displayed using a fish bone diagram.

### 117 **Goal refinement and change idea identification**

118 Following problem identification, the QIT refined the goal for the project which was a clear  
119 statement of the intended improvement and how it would be measured. The goal had the  
120 following attributes: specific, measurable, achievable, realistic and time bound. The QIT  
121 proposed changes/interventions to the identified problems. Teams identified the different  
122 change ideas that would bring about the desired change. These change ideas were organized  
123 into groups, each of which represents a similar notion or approach to change, or change  
124 concept. We then ranked the proposed changes.

### 125 **Intervention tools**

126 Based on the proposed changes, we identified tools required to implement the suggested  
127 changes. We focused on tools that were cheap and readily available to ensure sustainability of  
128 the project.

### 129 **Intervention monitoring and evaluation**

130 We used the PDSA cycles to plan and test the identified interventions. Through the weekly and  
131 monthly data collection, analysis and interpretation, the team was able to assess each  
132 implemented intervention for a positive change. The plan was to maintain interventions that  
133 improved reporting for malaria deaths, while interventions that did not cause change were  
134 dropped. The final evaluation was done in March 2023 to ascertain whether there was an  
135 improvement in the reporting rates of malaria deaths.

### 136 **Ethical considerations**

137 We obtained administrative clearance from Namutumba District Health Office and the health  
138 facility in charges for the selected health facilities. We further obtained verbal consent from the  
139 health facility staff that participated in the focus group discussions to generate existing gaps  
140 and required change ideas for improvement. Additional data was obtained from routinely  
141 collected malaria surveillance data in the health facility registers and the DHIS2 that is publicly  
142 available for analysis and use to inform public health interventions. The data was aggregated  
143 with no individual identifiers. This activity was reviewed by US Centers for Disease Control and  
144 Prevention (CDC) and was conducted consistent with applicable federal law and CDC  
145 policy. § See e.g., 45 C.F.R. part 46, 21 C.F.R. part 56; 42 U.S.C. §241(d); 5 U.S.C. §552a; 44  
146 U.S.C. §3501 et seq. This determination was made because the project aimed to address a  
147 public health problem and had the primary intent of public health practice.

148  
149

## 150 RESULTS

### 151 Baseline findings

152 During the baseline period reviewed, Namutumba HC III recorded 4 malaria deaths. Only 50%  
153 (2/4) of the confirmed malaria deaths were reported in the monthly HMIS 108 report while  
154 100% (4/4) were reported in the weekly surveillance report. For Nsinze HC IV, 32 malaria deaths  
155 were recorded in the period of September 2021-October 2022. Findings from the baseline data  
156 collection revealed that only 19% (6/32) confirmed malaria deaths were reported as in the  
157 monthly surveillance report while 81% (26/32) were reported in the weekly surveillance  
158 reports. We noted that HMIS 033b was collected from both out-patient and in-patient registers  
159 while the HMIS 108 report was collected from only the in-patient register for both health  
160 facilities as opposed to utilization of the inpatient register as the official data source for malaria  
161 mortality.

162

### 163 Process mapping and gap identification

164 Following review of the reporting system for malaria deaths, gaps were identified at the steps  
165 of data entry in the primary registers and data compilation from the registers. Other steps like  
166 data entry on hard copy reports and entry of data in the electronic HMIS had no gaps identified  
167 (Figure 1). This informed our choice to focus on data entry into the inpatient register for root  
168 cause analysis since this is the primary source document for malaria deaths data.

169

### 170 Root causes affecting entry of malaria deaths data in the in-patient registers for Namutumba 171 District, September 2021–October 2022

172 As depicted in figure 2 below, the root cause of failure to enter malaria death data included:

173 **Lack of continuous medical education on malaria deaths definition and documentation:** Insufficient  
174 continuous medical education (CMEs) on the definition and documentation of malaria deaths led to  
175 health workers documenting complications rather than malaria as the cause of death in primary  
176 registers, despite malaria being the primary diagnosis. The knowledge gap resulting from the lack of  
177 CMEs contributed to low documentation and reporting of malaria deaths.

178 **Absence of consequences for non-reporting of malaria deaths:** The absence of consequences  
179 for non-reporting of malaria deaths led to reluctance among health workers to document such  
180 deaths, as it involved additional paperwork, including filling out medical certificates of cause of  
181 death and entering data into the DHIS2.

182 **Limited supervision and monitoring performance:** Limited supervision and monitoring  
183 performance of health workers contributed to staff reluctance in accurately documenting and  
184 reporting malaria deaths.

185 **Unclear guidance on malaria death documentation:** Severe malaria deaths are expected to be  
186 recorded in the in-patient register; however, deaths occurring at health facility gates,  
187 outpatient department, and on the facility premises after referral were often not documented

188 or recorded in the outpatient register. This inconsistency resulted in discrepancies between  
189 weekly and monthly reports, as the monthly report relies on both inpatient and outpatient  
190 registers. Similar challenges arose for deaths occurring on the way to the health facility or at  
191 home, as there was no clear guidance on documenting such deaths happening outside the  
192 inpatient wards and in the community.

193 Following the brainstorming exercise, a range of change interventions were identified for  
194 improving reporting of malaria death data. These included:

- 195 a) Conducting regular CMEs on malaria death definition, recording, and reporting
- 196 b) Conducting CMEs to guide on the documentation of death on arrival and after referral
- 197 c) Conducting one on one mentorship on malaria deaths documentation
- 198 d) Establishment of focal persons to ensure timely update of malaria deaths in the IPD  
199 register
- 200 e) Conducting weekly malaria death data reviews
- 201 f) Strengthening the system of support supervision and monitoring

202 The change interventions were then turned into activities with clear indicators and means of  
203 verification and responsible persons identified for each activity (Table 1)

**Table 1. Quality improvement interventions and indicators**

| <b>Intervention</b>                                                                  | <b>Activity Description</b>                                                                                                                                                                                                                                                                                                                                                                                                                                                                                                                                                                                                                                                                       | <b>Responsible Person</b>      | <b>Indicator</b>                                                                                         | <b>Means of verification</b> |
|--------------------------------------------------------------------------------------|---------------------------------------------------------------------------------------------------------------------------------------------------------------------------------------------------------------------------------------------------------------------------------------------------------------------------------------------------------------------------------------------------------------------------------------------------------------------------------------------------------------------------------------------------------------------------------------------------------------------------------------------------------------------------------------------------|--------------------------------|----------------------------------------------------------------------------------------------------------|------------------------------|
| Conducting regular CMEs on malaria death definition, recording, and reporting        | Bi-monthly CMEs on malaria deaths definition, documentation and reporting. Using a CME schedule, notification was made to all health facility team by in charges to ensure attendance.                                                                                                                                                                                                                                                                                                                                                                                                                                                                                                            | Clinician responsible for CMEs | Proportion of health facility staff with knowledge of malaria death definition, recording, and reporting | Inpatient register           |
| Conducting CMEs to guide on the documentation of death on arrival and after referral | The QIT discussed and agreed on the best way to document malaria death on arrival and after referral. Since there was no clear guidance, the team agreed that malaria deaths on arrival with positive malaria results and those dying in the resuscitation room would be documented in a special way in the inpatient register clearly indicating the place of deaths in the comment section. Patients dying on the health facility premises following referral would have their outcome changed from referred to Died and captured as a health facility death. These resolutions were provided to the rest of the team during the bi-weekly CMEs to ensure implementation by every staff member. | Clinician responsible for CMEs | Proportion of malaria deaths at the facility documented in the inpatient register.                       | Inpatient register           |

|                                                                                              |                                                                                                                                                         |                                |                                                                                                              |                                        |
|----------------------------------------------------------------------------------------------|---------------------------------------------------------------------------------------------------------------------------------------------------------|--------------------------------|--------------------------------------------------------------------------------------------------------------|----------------------------------------|
|                                                                                              |                                                                                                                                                         |                                |                                                                                                              |                                        |
| Conducting one on one mentorship on malaria deaths documentation                             | Mentorship of clinicians (medical officers, nurses and midwives) and medical records staff on required data parameters for malaria deaths documentation | Clinician responsible for CMEs | % of health workers with competency to document malaria deaths completely and accurately                     | Inpatient register                     |
| Establishment of focal persons to ensure timely update of malaria deaths in the IPD register | Assigned focal persons reviewed the registers after recording a death to ensure completeness and accurateness of documentation                          | Malaria Focal Person           | Proportion of malaria deaths at the facility documented completely and accurately in the inpatient register. | Inpatient register                     |
| Conducting weekly malaria death data reviews                                                 | Weekly review of inpatient client cards and Outpatient registers to ensure that all malaria deaths were documented in the inpatient register.           | Quality Improvement Team       | Proportion of malaria deaths at the facility documented in the inpatient register.                           | Inpatient register                     |
| Strengthening the system of support supervision and monitoring                               | Weekly review of the inpatient registers to ensure that all malaria deaths recorded have medical certificates of cause of death filled and filed        | Health Facility In charges     | % malaria deaths reported in HMIS033b                                                                        | HMIS 033b report<br>Inpatient register |

205

206

207

208

209



## 210 **Final evaluation of the quality improvement project**

211 Following implementation of QI project in Namutumba District, there was an improvement in  
212 the reporting of malaria deaths from 69% for the weekly report and 11% for the monthly report  
213 to 100% during the period of November 2022 to March 2023 with all the seven malaria deaths  
214 recorded and reported in the weekly and monthly reports. All the seven malaria deaths that  
215 happened in the health facilities were appropriately documented in the primary source  
216 document (inpatient register) and reported in the weekly surveillance and monthly reports for  
217 all the 5 months of project implementation.

218

## 219 **Discussion**

220 The project identified gaps and challenges in reporting malaria deaths, leading to low rates in  
221 both weekly and monthly surveillance reports. Contributing factors included the absence of  
222 Continuous Medical Education (CME) on malaria deaths, limited supervision, lack of  
223 consequences for non-reporting, and unclear guidance on documenting deaths in specific  
224 scenarios. After implementing proposed changes, there was an improvement in reporting  
225 malaria deaths, enhancing data quality at health facility, district, and national levels. This  
226 improvement could positively impact planning efforts by various stakeholders.

227 The study revealed a knowledge gap among health workers regarding the definition of malaria  
228 death due to the lack of CME on this topic. This knowledge gap resulted in misclassification and  
229 the subsequent underestimation of the burden of malaria deaths. According to the district  
230 health information system version 2 (DHIS2), a malaria death is defined as any death with a  
231 positive malaria test in a reporting health facility or community [7, 8]. Severe malaria that  
232 causes deaths presents with numerous complications like anaemia, respiratory failure, impaired  
233 consciousness and renal failure [9]. This complexity contributes to potential misclassification,  
234 particularly in the presence of a knowledge gap on the case definition of malaria death. Similar  
235 challenges have been observed in India, where a study highlighted the difficulty in defining and  
236 recording malaria deaths, because individuals with malaria may also suffer from other illnesses  
237 concurrently or in quick succession [10]. Regular CMEs are essential to ensure that all attending  
238 clinicians comprehend the accurate case definition for malaria deaths, facilitating accurate  
239 documentation and reporting.

240 Our study highlighted the lack of clear guidance on the documentation of malaria deaths upon  
241 arrival at the facility and deaths at the health facility premises after referral. As data on malaria  
242 deaths is extracted from the inpatient register (HMIS 075) and reported in the HMIS 108 report  
243 (Inpatient report), cases that do not reach the inpatient unit are often missed. Deaths on arrival  
244 might be recorded in the outpatient registers and included in the weekly surveillance report  
245 from the outpatient register, leading to inconsistencies between the HMIS 033b and HMIS 108  
246 reports. The US Presidential Malaria Initiative (PMI), Roll Back Malaria (RBM) and Measure  
247 Evaluation have provided guidance for Evaluating the Impact of National Malaria Control

248 Programs in Highly Endemic Countries. They highlight challenges in malaria-specific mortality  
249 surveillance and recommend using multiple data sources to compliment limitation from each  
250 method. Recommended sources in addition to the health information system include use of  
251 verbal autopsies, health and demographic surveillance systems (HDSS), civil registration and  
252 vital statistics systems and lastly the use of all child mortality as an impact indicator [11].

253 The study further revealed unclear guidance on documentation and recording of community  
254 malaria deaths. According to the NMCD, community/village health teams (VHTs) should follow  
255 up cases at home to ensure treatment compliance and recovery and to report any deaths due  
256 to malaria at home[7]. VHTs are required to report their data to health facilities quarterly;  
257 however, very few of them do report citing numerous challenges, including lack of transport,  
258 since in Uganda they are volunteers with no pay and with little supervision[12-14]. Scholars  
259 from other countries have suggested monetary facilitation and supervision to ensure they  
260 execute their roles[12, 15]. Moreover, the quarterly reporting system lacks timeliness for  
261 informing interventions. As such, exploring more frequent reporting mechanisms could  
262 enhance the capture of accurate and up-to-date information. Establishing clear guidance on the  
263 optimal reporting of community malaria deaths and issuing an official memo to all districts on  
264 this matter could ensure that reported malaria death numbers accurately reflect the burden of  
265 malaria deaths, and facilitating effective planning.

266 Our study revealed staff reluctance to document malaria deaths due to the additional workload  
267 involved in reporting, such as completing the medical certificate of cause of death. In a study to  
268 evaluate the impact of system failures on health workers, researchers noted that a failure in the  
269 complex system health workers work from causes physical and emotional burnout which may  
270 manifests as decreased production and lack of motivation. A system approach to existing  
271 challenges affecting health workers was proposed for improved performance[16]. Similarly, in  
272 our setting, addressing workload challenges by encouraging teamwork coupled with enhanced  
273 supervision and mentorship, could improve health worker productivity and ensure accurate  
274 reporting for effective planning of required interventions

### 275 **Study limitations**

276 Our study faced limitations regarding the timely reporting of community malaria deaths due to  
277 a lack of guidance from the Ministry of Health on capturing these data at health facilities on a  
278 weekly and monthly basis. This limitation could have led to an underestimation of malaria  
279 deaths in Namutumba District. However, we minimized this limitation by strengthening the  
280 documentation of all malaria deaths occurring on arrival and immediately after referral from  
281 the health facility.

282

283

284

## 285 **Conclusion**

286 There was improvement in malaria mortality reporting attributed to continuous medical  
287 education, supervision and monitoring performance of health facility staff, clear and  
288 comprehensive guidance on documentation of malaria deaths and weekly data reviews.  
289 Ensuring regular CMEs, data review, support supervision, and comprehensive guidance on  
290 documenting malaria deaths could enhance reporting, aiding planning, and reinforcing efforts  
291 to achieve the malaria eradication target by 2030.

292

## 293 **List of Abbreviations**

294 **CQI**: Continuous Quality Improvement; **DHI**: Division for Health Information; **DHIS2**: District  
295 Health Information System 2; **DHT**: District Health Team; **HMIS**: Health Management  
296 Information System; **IPD**: In-patient Department; **MOH**: Ministry of Health; **NMCD**: National  
297 Malaria Control Division; **OPD**: Out-patient Department; **PDSA**: Plan Do Study Act; **VHT**: Village  
298 Health Team

## 299 **Declarations**

### 300 **Availability of data and materials**

301 The datasets upon which our findings are based belong to the Uganda Public Health Fellowship  
302 Program. For confidentiality reasons the datasets are not publicly available. However, the data  
303 sets can be availed upon reasonable request from the corresponding author and with  
304 permission from the Uganda Public Health Fellowship Program.

### 305 **Conflict of Interest**

306 The authors declare no conflicts of interest.

### 307 **Consent for publication**

308 Not applicable.

### 309 **Funding and Disclaimer**

310 This project was supported by the United States Agency for International Development  
311 (USAID)/President's Malaria Initiative (PMI) through the US Centers for Disease Control and  
312 Prevention Cooperative Agreement number GH001353 through Makerere University School of  
313 Public Health. Its contents are solely the responsibility of the authors and do not necessarily  
314 represent the official views of the US Centers for Disease Control and Prevention, the  
315 Department of Health and Human Services, Makerere University School of Public Health, or the  
316 MoH. The staff of the funding body provided technical guidance in the design of the study,  
317 ethical clearance and collection, analysis, and interpretation of data, and in writing the  
318 manuscript.

319

## 320 Authors contribution

321 GMZ collected data under technical guidance and supervision of RM, BK, DK, LB and ARA. GMZ  
322 analyzed and interpreted the data. GMZ drafted the manuscript. GMZ, RM, LB, ARA, critically  
323 reviewed the manuscript for intellectual content. All co-authors read and approved the final  
324 manuscript. GMZ is the guarantor of the paper.

## 325 Acknowledgements

326 We appreciate the Nsinze HC IV and Namutumba HC III health facility staff for their active  
327 participation and implementation of the project. More appreciation to the Namutumba District  
328 health Office for their leadership and guidance most especially the District Malaria Focal  
329 Person.

## 330 References

- 331 1. National Malaria Control Program, M.o.H.U., *Weekly Malaria Reports*. 2022: Ministry of Health  
332 Uganda - Knowledge management Portal.
- 333 2. Organisation, W.H., *World Malaria Report 2022*. 2022: Geneva.
- 334 3. Zalwango, M.G., *Risk factors for death among children with severe malaria in Namutumba*  
335 *District, Uganda, September 2021-February 2022*. Uganda National Institute of Public Health  
336 Bulletin, 2022. **7**(4).
- 337 4. Kigozi, S.P., et al., *Spatial-temporal patterns of malaria incidence in Uganda using HMIS data*  
338 *from 2015 to 2019*. BMC public health, 2020. **20**(1): p. 1-14.
- 339 5. Mpimbaza, A., et al., *Adherence to malaria management guidelines by health care workers in the*  
340 *Busoga sub-region, eastern Uganda*. Malaria Journal, 2022. **21**(1): p. 1-15.
- 341 6. Namutumba District Local Government, U. *Namutumba District*. 2022; Available from:  
342 <https://namutumba.go.ug/lg/district-location-and-its-neighbors>.
- 343 7. National Malaria Control Program, M.o.H.U., *Guidelines for Prevention, Preparedness and*  
344 *Response for Malaria Epidemics*. 2019. p. 19-20.
- 345 8. National Malaria Control Program, M.o.H.U., *THE UGANDA MALARIA REDUCTION AND*  
346 *ELIMINATION STRATEGIC PLAN 2021-2025*. 2020, Ministry of Health Uganda: Kampala.
- 347 9. National Malaria Control Program, M.o.H.U., *Uganda National Malaria Control Policy*. . 2011. p.  
348 Pg 8.
- 349 10. Shah, N.K., *Defining & counting malaria deaths*. The Indian Journal of Medical Research, 2012.  
350 **135**(3): p. 270.
- 351 11. Malaria, R.B., *Guidance for Evaluating the Impact of National Malaria Control Programs in Highly*  
352 *Endemic Countries*. 2014.
- 353 12. O'Donovan, J., et al., *'We are the people whose opinions don't matter'. A photovoice study*  
354 *exploring challenges faced by community health workers in Uganda*. Global public health, 2020.  
355 **15**(3): p. 384-401.
- 356 13. O'Donovan, J., et al., *Potential challenges of implementing the Community Health Extension*  
357 *Worker programme in Uganda*. BMJ global health, 2018. **3**(4): p. e000960.
- 358 14. Brunie, A., et al., *Keeping community health workers in Uganda motivated: key challenges,*  
359 *facilitators, and preferred program inputs*. Global Health: Science and Practice, 2014. **2**(1): p.  
360 103-116.
- 361 15. Hill, Z., et al., *Supervising community health workers in low-income countries—a review of impact*  
362 *and implementation issues*. Global health action, 2014. **7**(1): p. 24085.
- 363 16. Zangaro, G. *Impact of System Failures on Healthcare Workers*. 2023.

**Figure 1: Number of gaps identified during the process mapping activity, Namutumba District, Eastern Uganda, September 2021–October 2022**

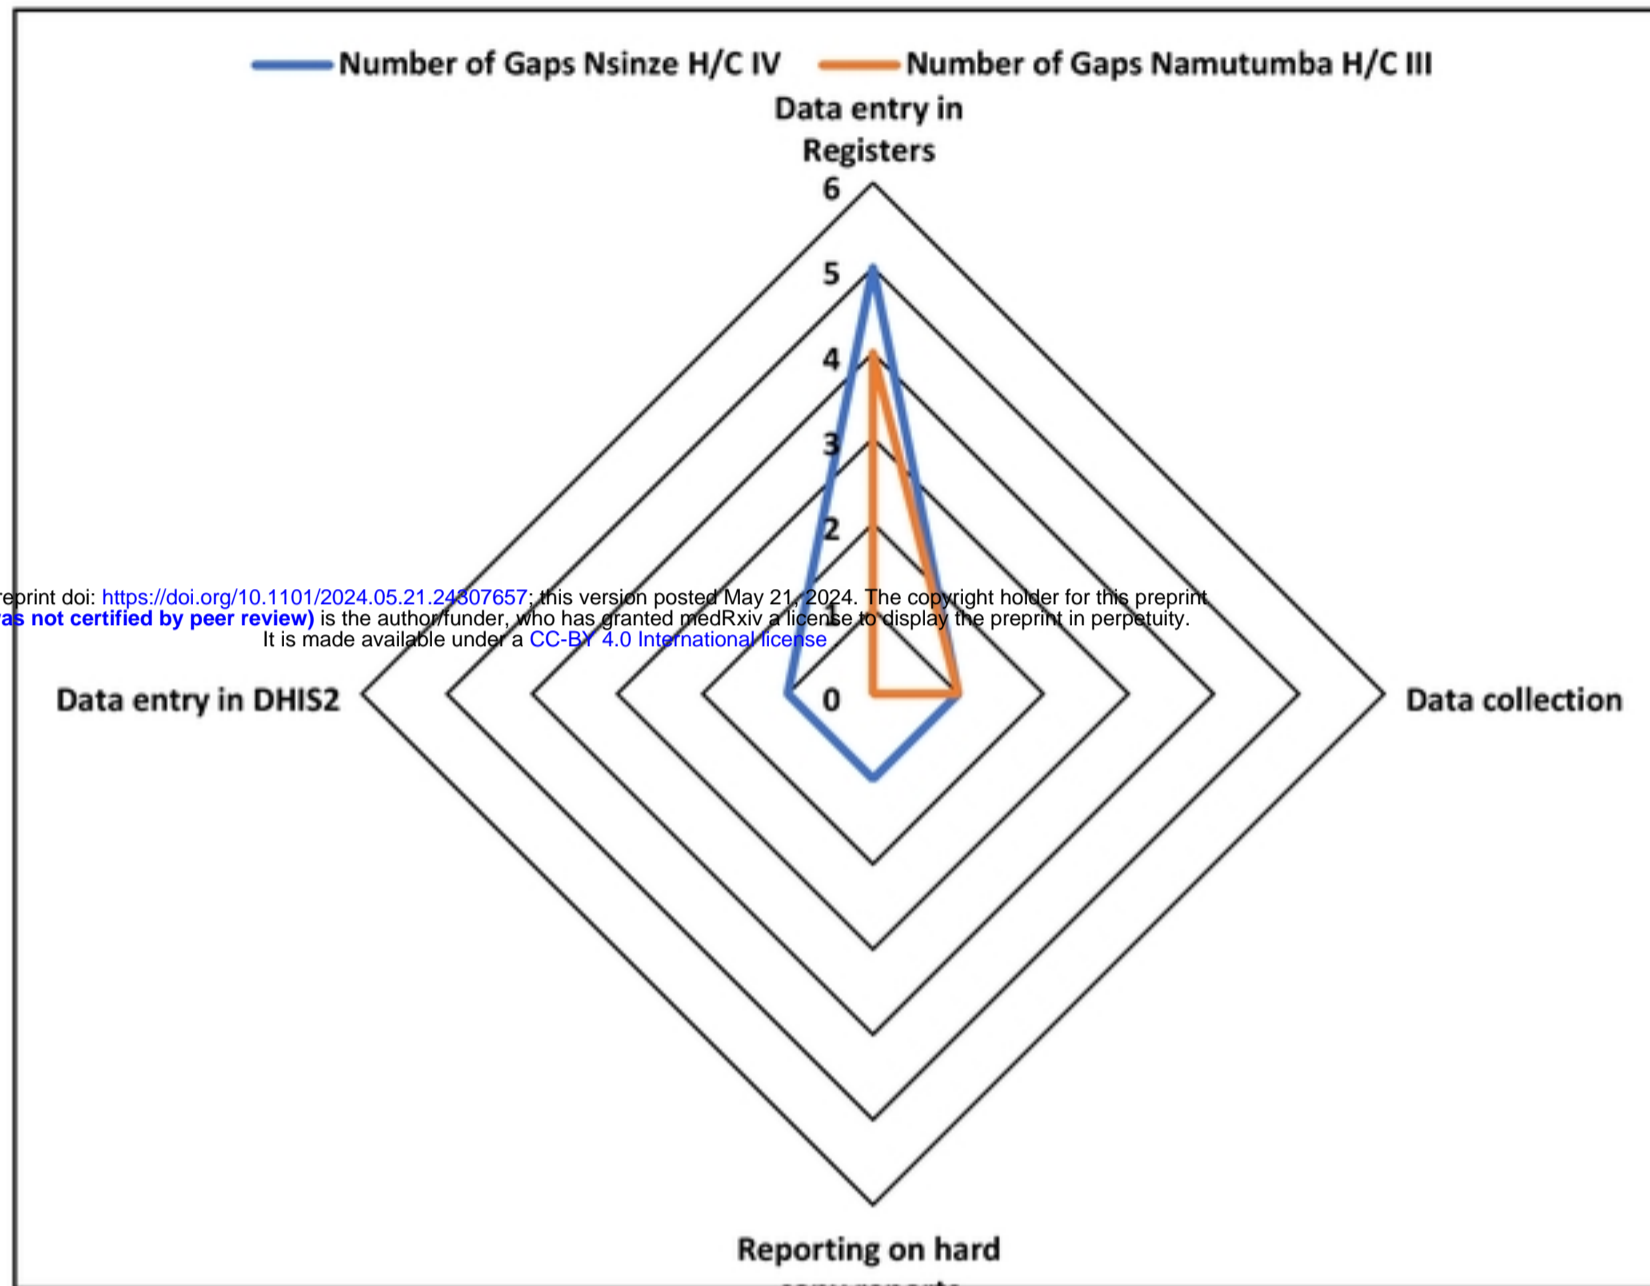

medRxiv preprint doi: <https://doi.org/10.1101/2024.05.21.24807657>; this version posted May 21, 2024. The copyright holder for this preprint (which was not certified by peer review) is the author/funder, who has granted medRxiv a license to display the preprint in perpetuity. It is made available under a [CC-BY 4.0 International license](https://creativecommons.org/licenses/by/4.0/).

**Figure 2: Root causes for the gaps identified during the problem identification at the health facilities in Namutumba District, Eastern Uganda, September 2021—October 2022**

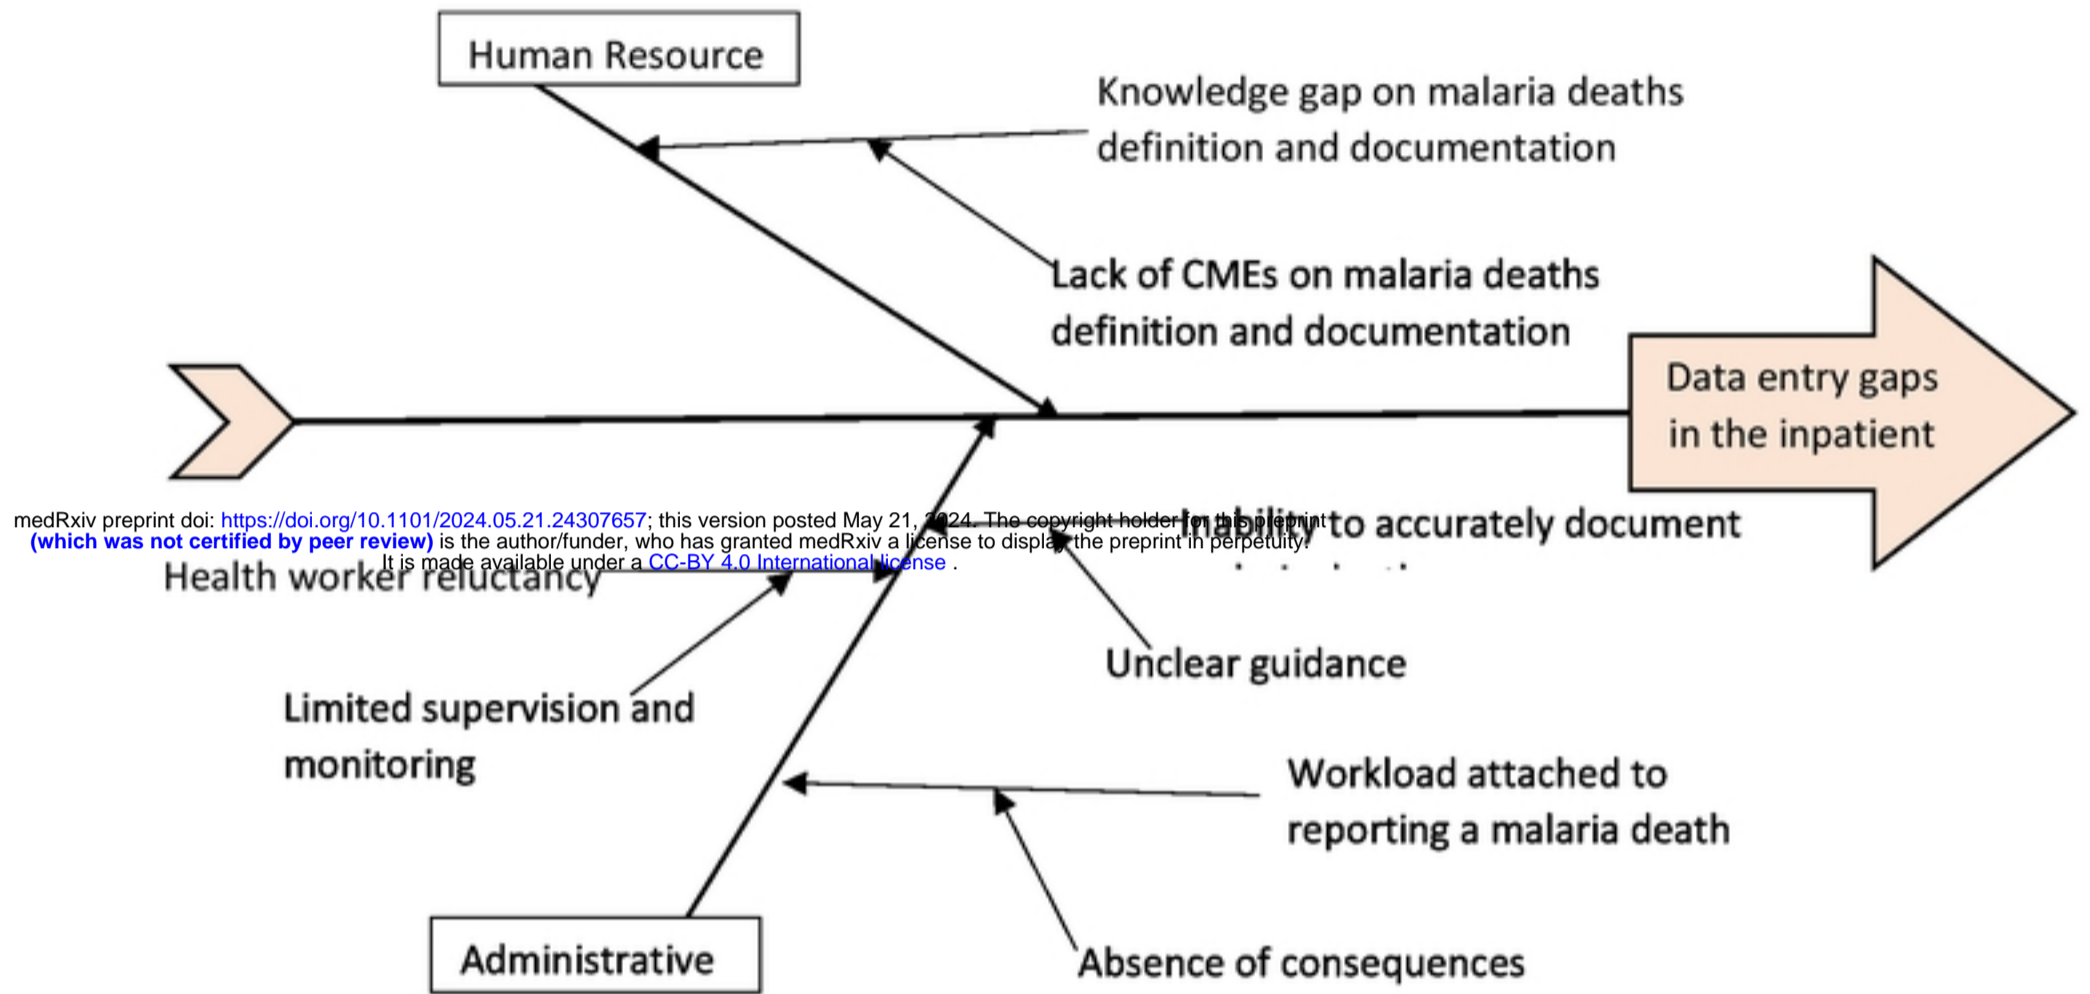

**Figure 3: Changes in malaria mortality reporting for the health facilities in Namutumba District, Eastern Uganda, November 2022—March 2023**

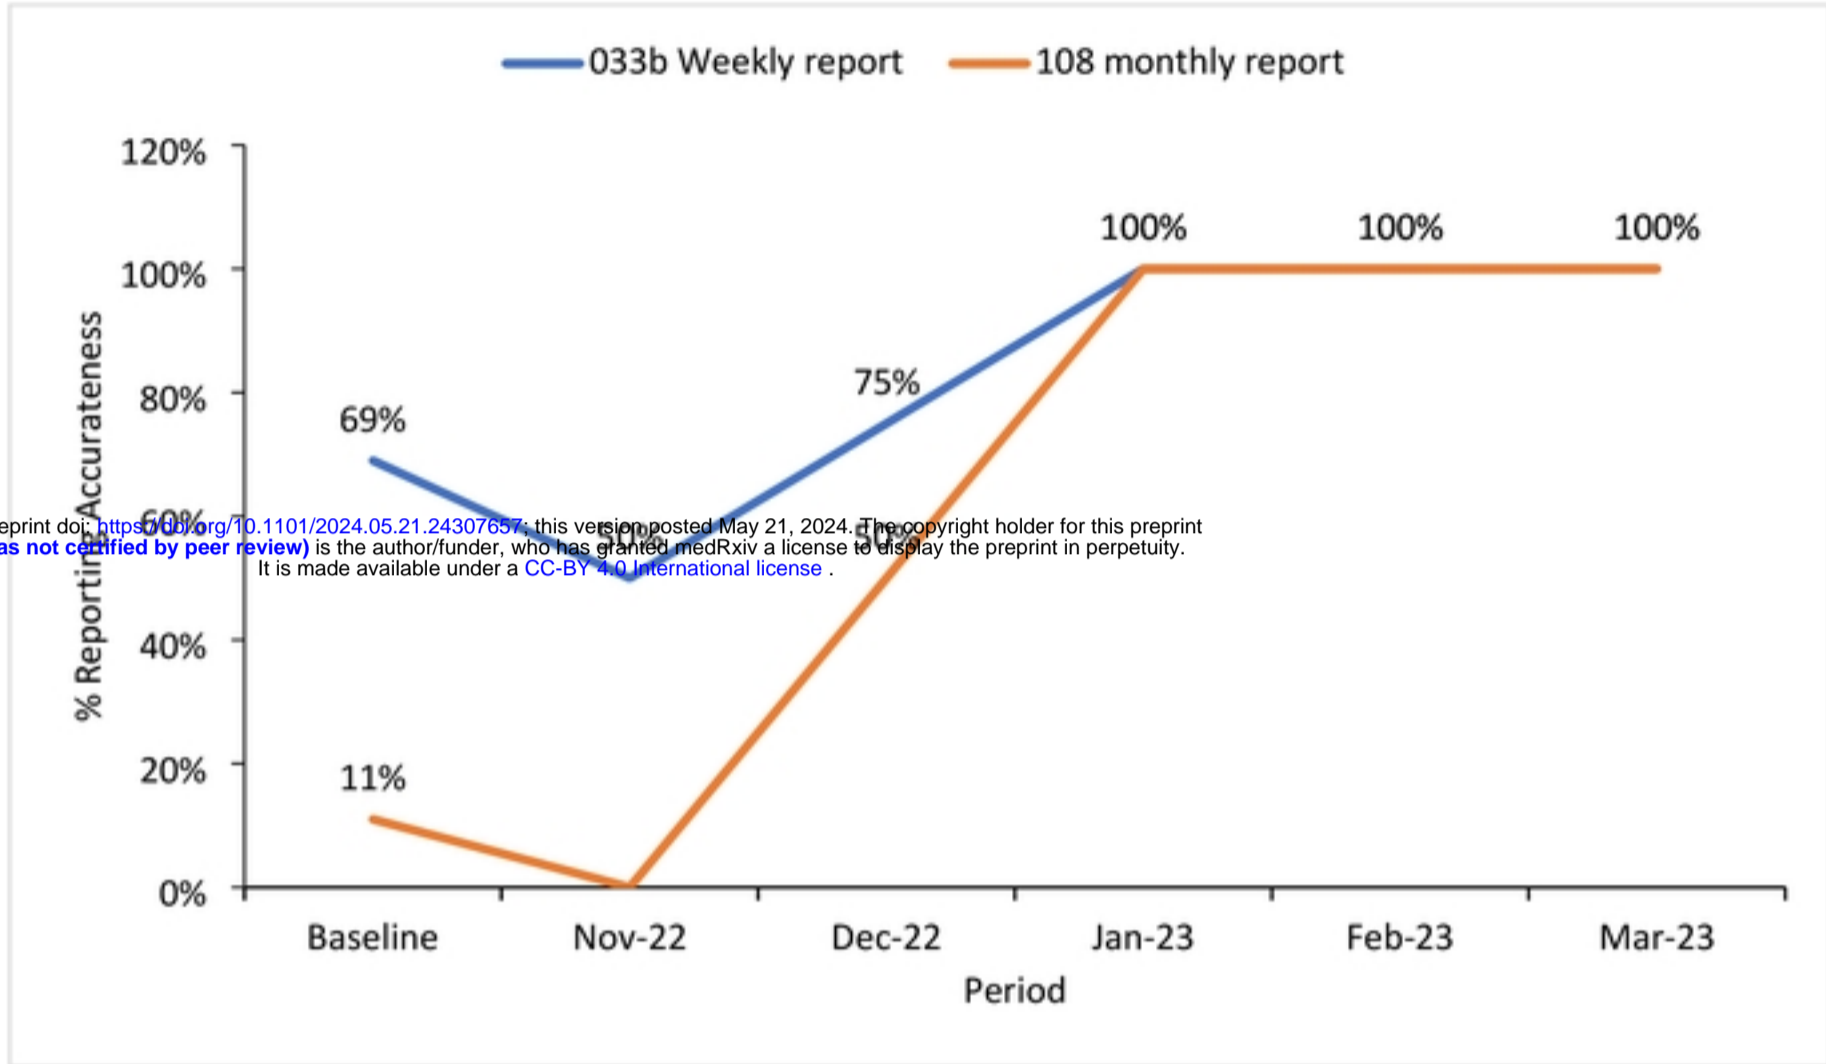

medRxiv preprint doi: <https://doi.org/10.1101/2024.05.21.24307657>; this version posted May 21, 2024. The copyright holder for this preprint (which was not certified by peer review) is the author/funder, who has granted medRxiv a license to display the preprint in perpetuity. It is made available under a [CC-BY 4.0 International license](https://creativecommons.org/licenses/by/4.0/).
